# Supplementary material for: Design, Synthesis, and Cytotoxicity Evaluation of Novel Griseofulvin Analogues with Improved Water Solubility
Source: Hindawi journal article supplement (doi:10.1155/2017/7386125), 2017-12-07

# <sup>13</sup>C-chart of compound 5

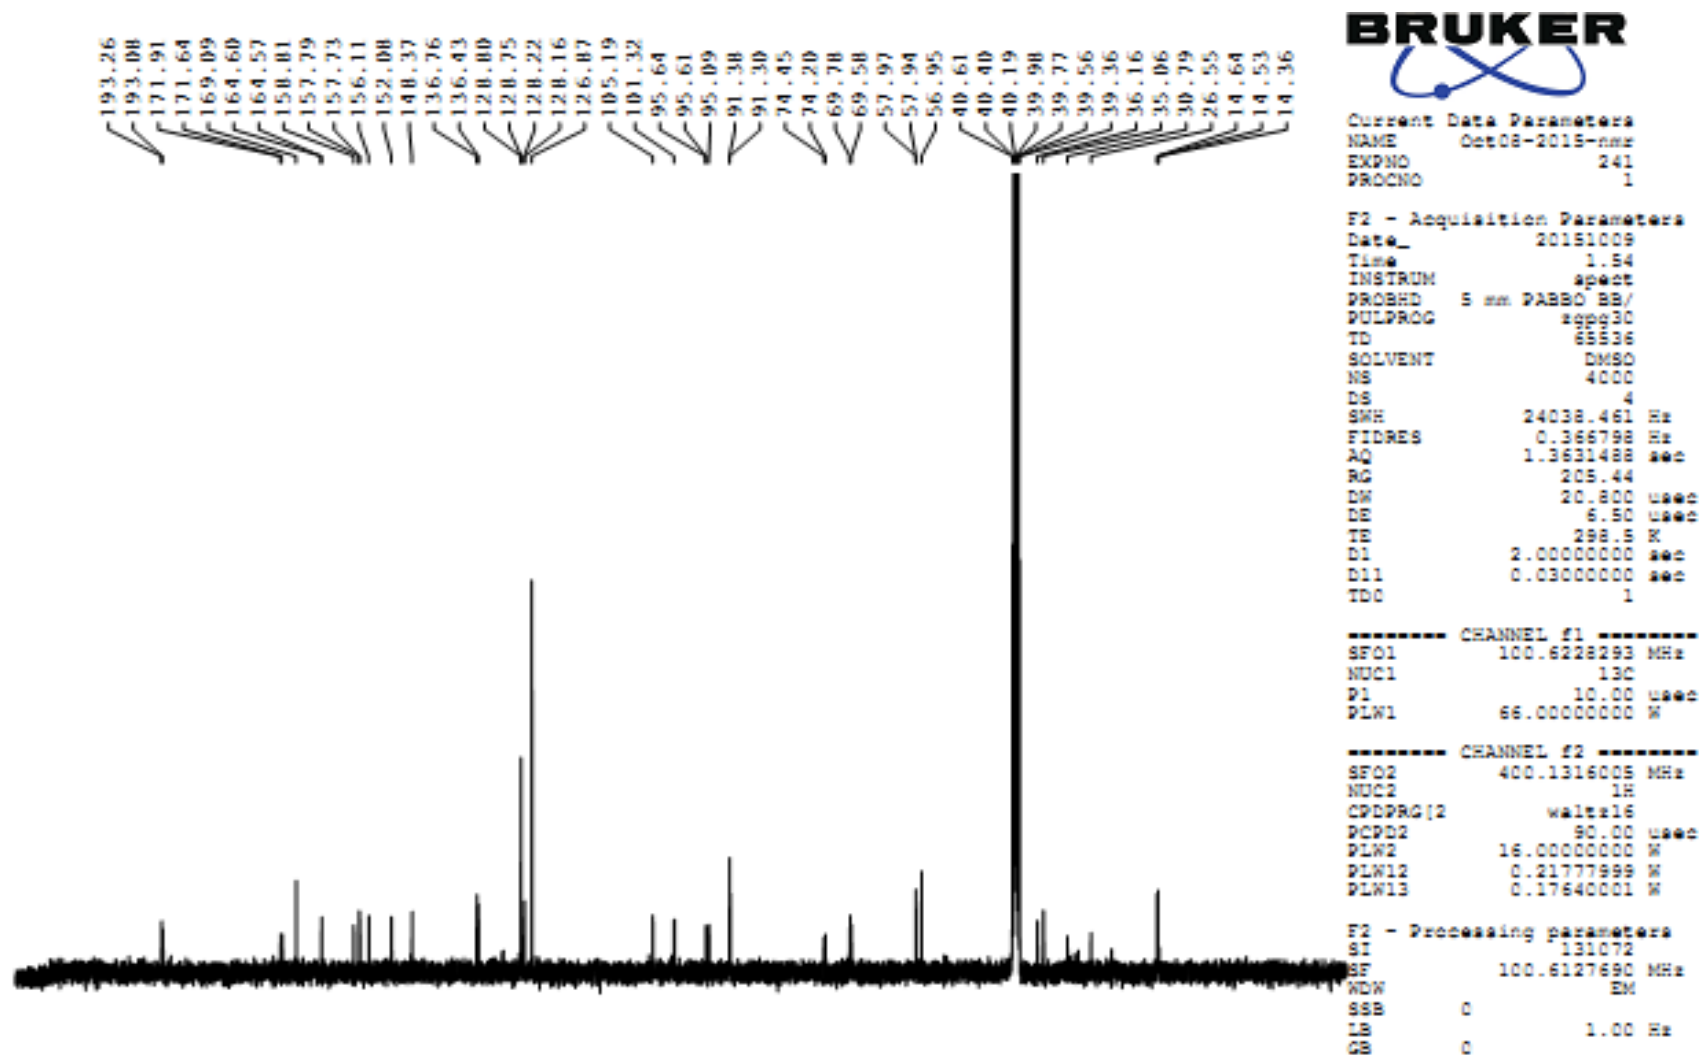

# <sup>13</sup>C-chart of compound 6

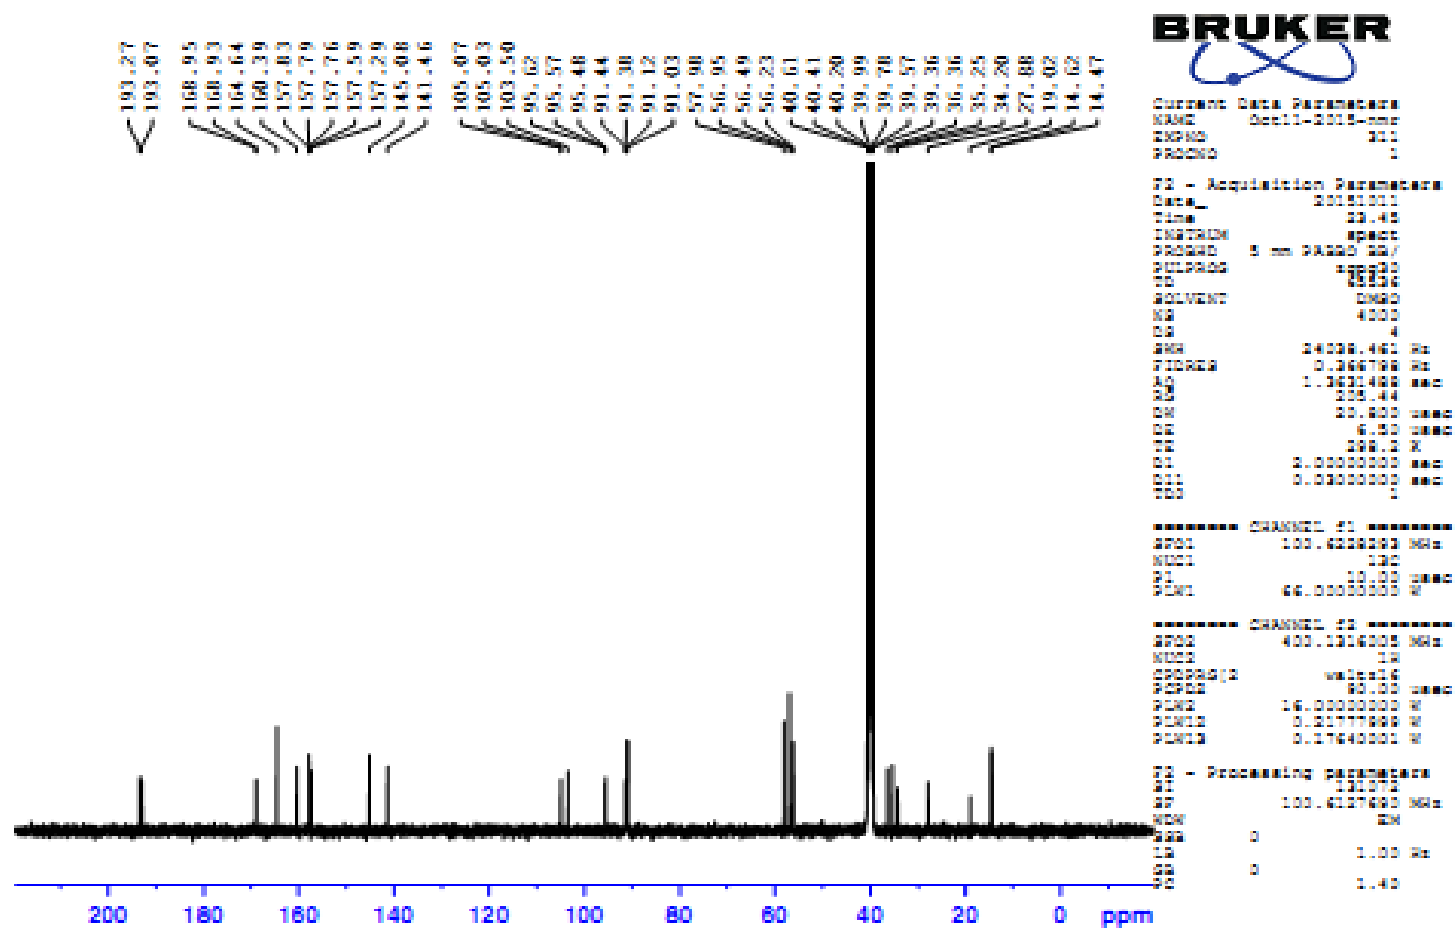

# <sup>13</sup>C-chart of compound 7

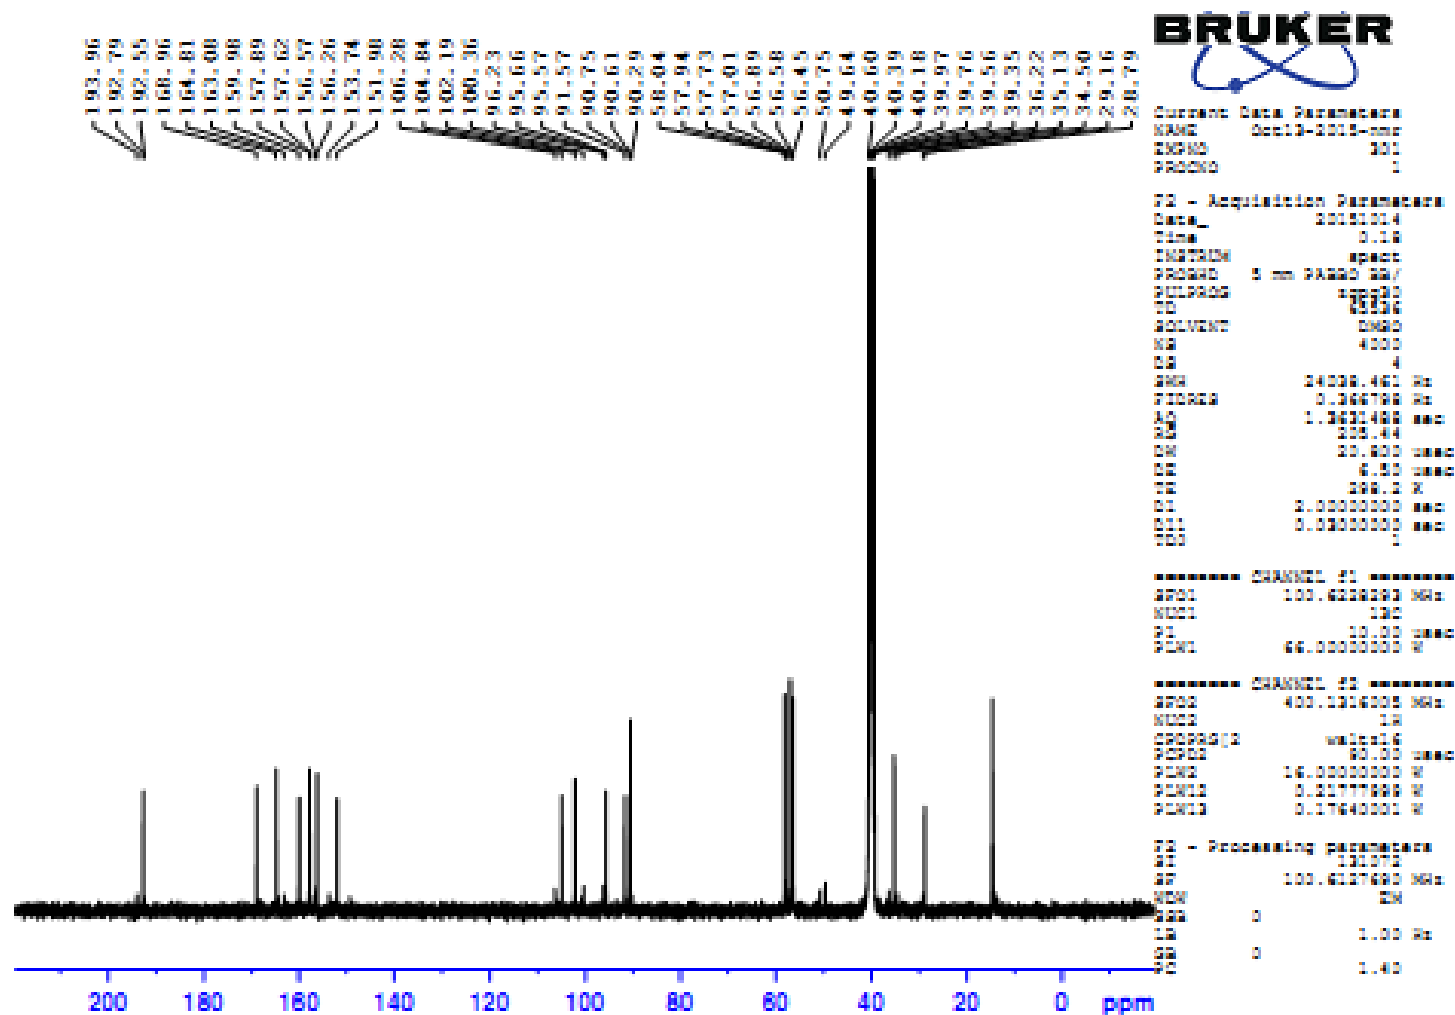

# <sup>13</sup>C-chart of compound 8

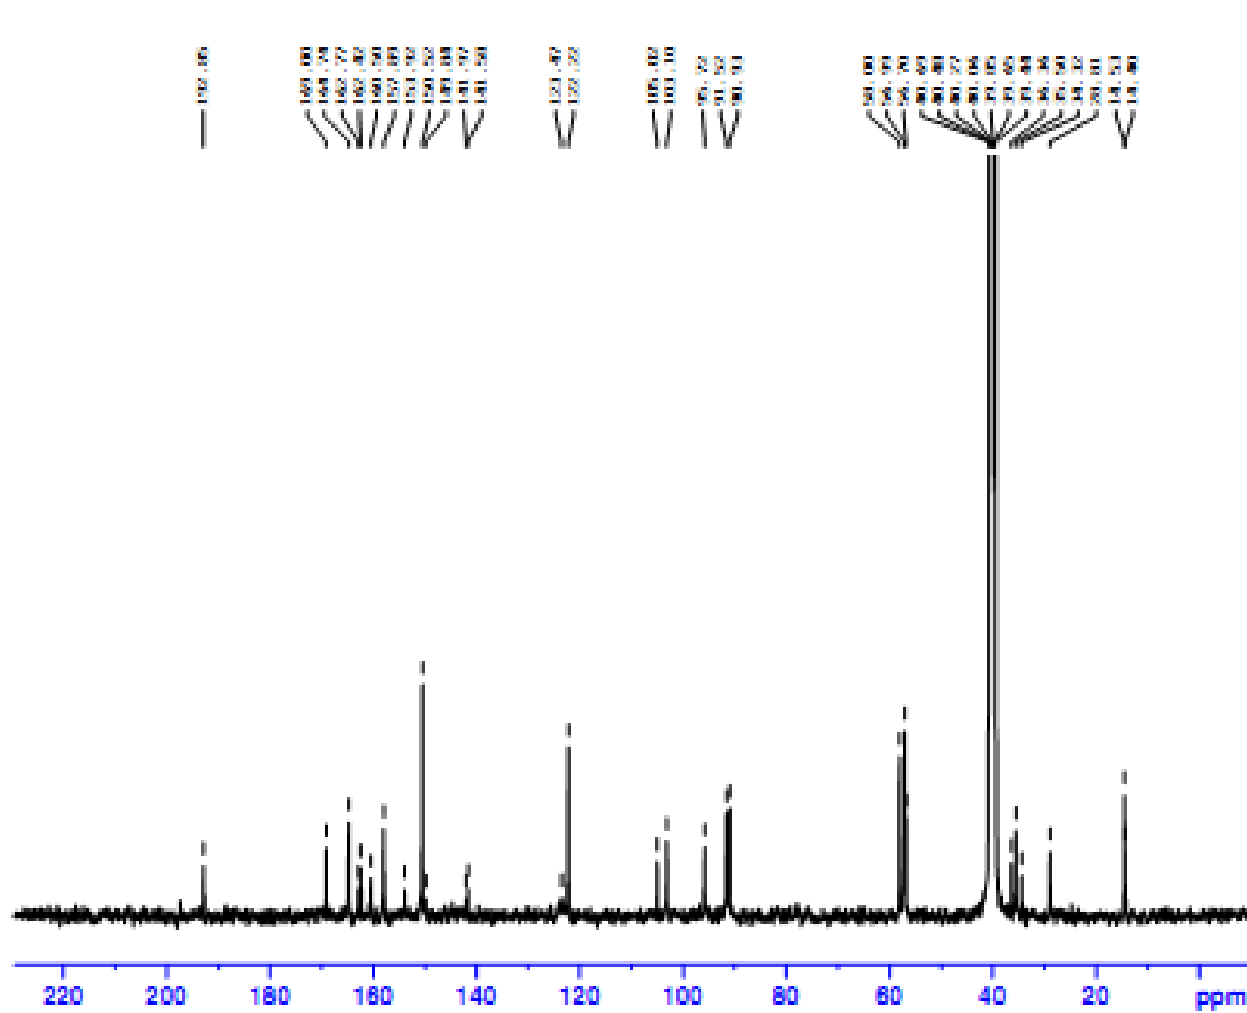

Current Data Parameters  
NAME: 201711-2010  
EXPNO: 43  
PROCNO: 1

F2 - Acquisition Parameters  
Date\_: 20160711  
Time: 19.38  
INSTRUM: spect  
PROBHD: 5 mm QNP5B/1  
PULPROG: zgpg30  
TD: 65536  
SOLVENT: DMF0  
NS: 2000  
DS: 4  
SWH: 24328.461 kHz  
FIDRES: 0.366788 kHz  
AQ: 1.3632488 s  
RG: 384.76  
SQ: 20.800  
SSB: 0.00  
SI: 32768  
SF: 100.6264600 MHz  
WDW: EM  
GB: 0

===== CHANNEL f1 =====  
NUC1: 13C  
P1: 0.50 s  
PL1: 0.0000000 dB

===== CHANNEL f2 =====  
NUC2: 13C  
P2: 0.50 s  
PL2: 0.0000000 dB

F2 - Processing parameters  
SI: 32768  
SF: 100.6264600 MHz  
WDW: EM  
SSB: 0  
LB: 6.00 Hz  
GB: 0  
PC: 2.40

# <sup>13</sup>C-chart of compound 9

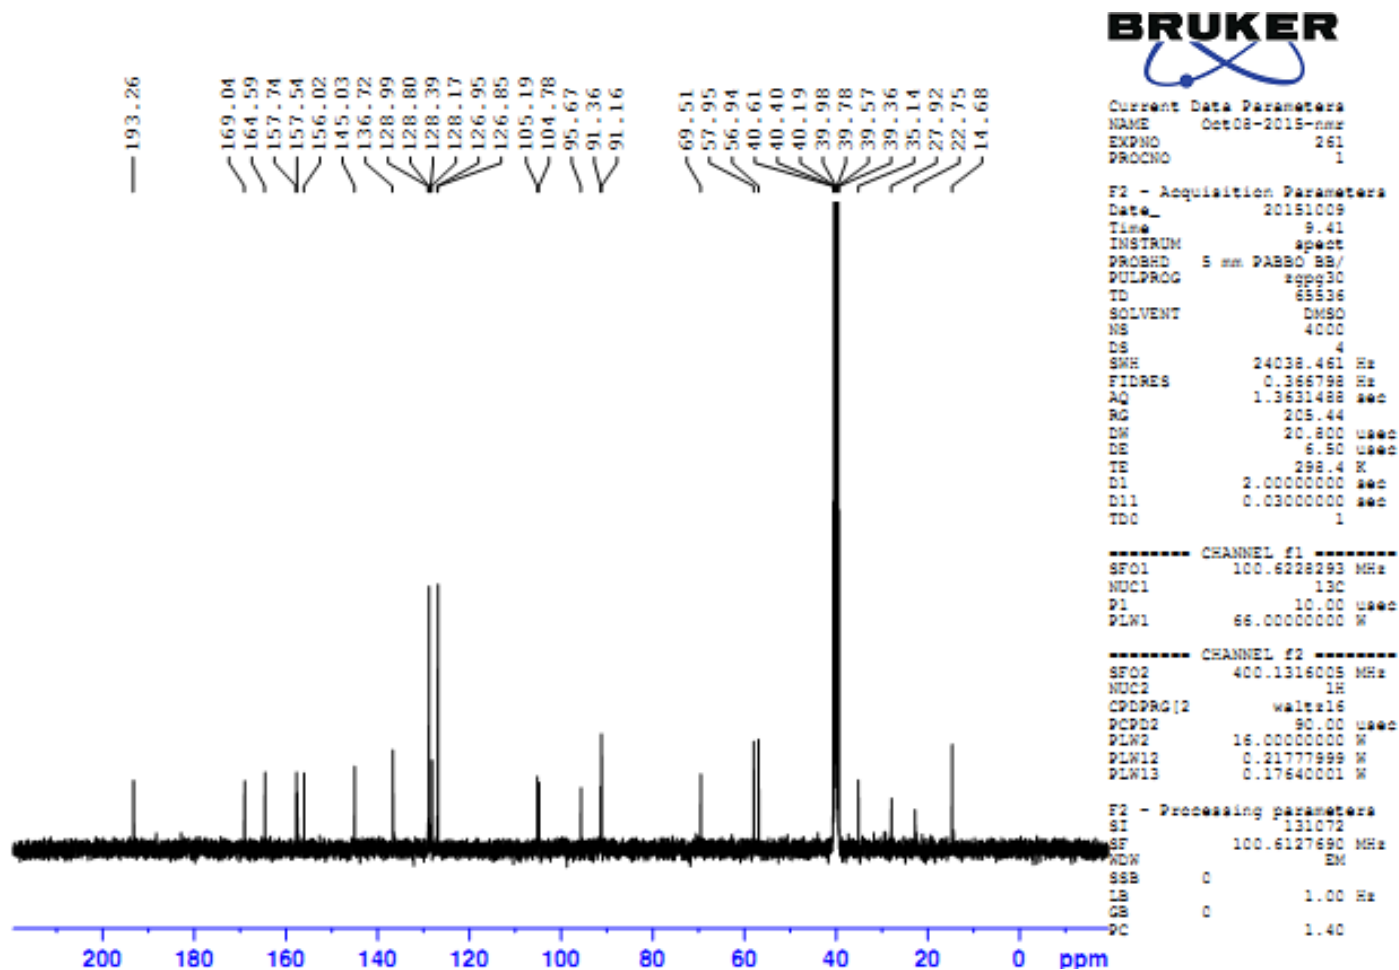

# <sup>13</sup>C-chart of compound 10

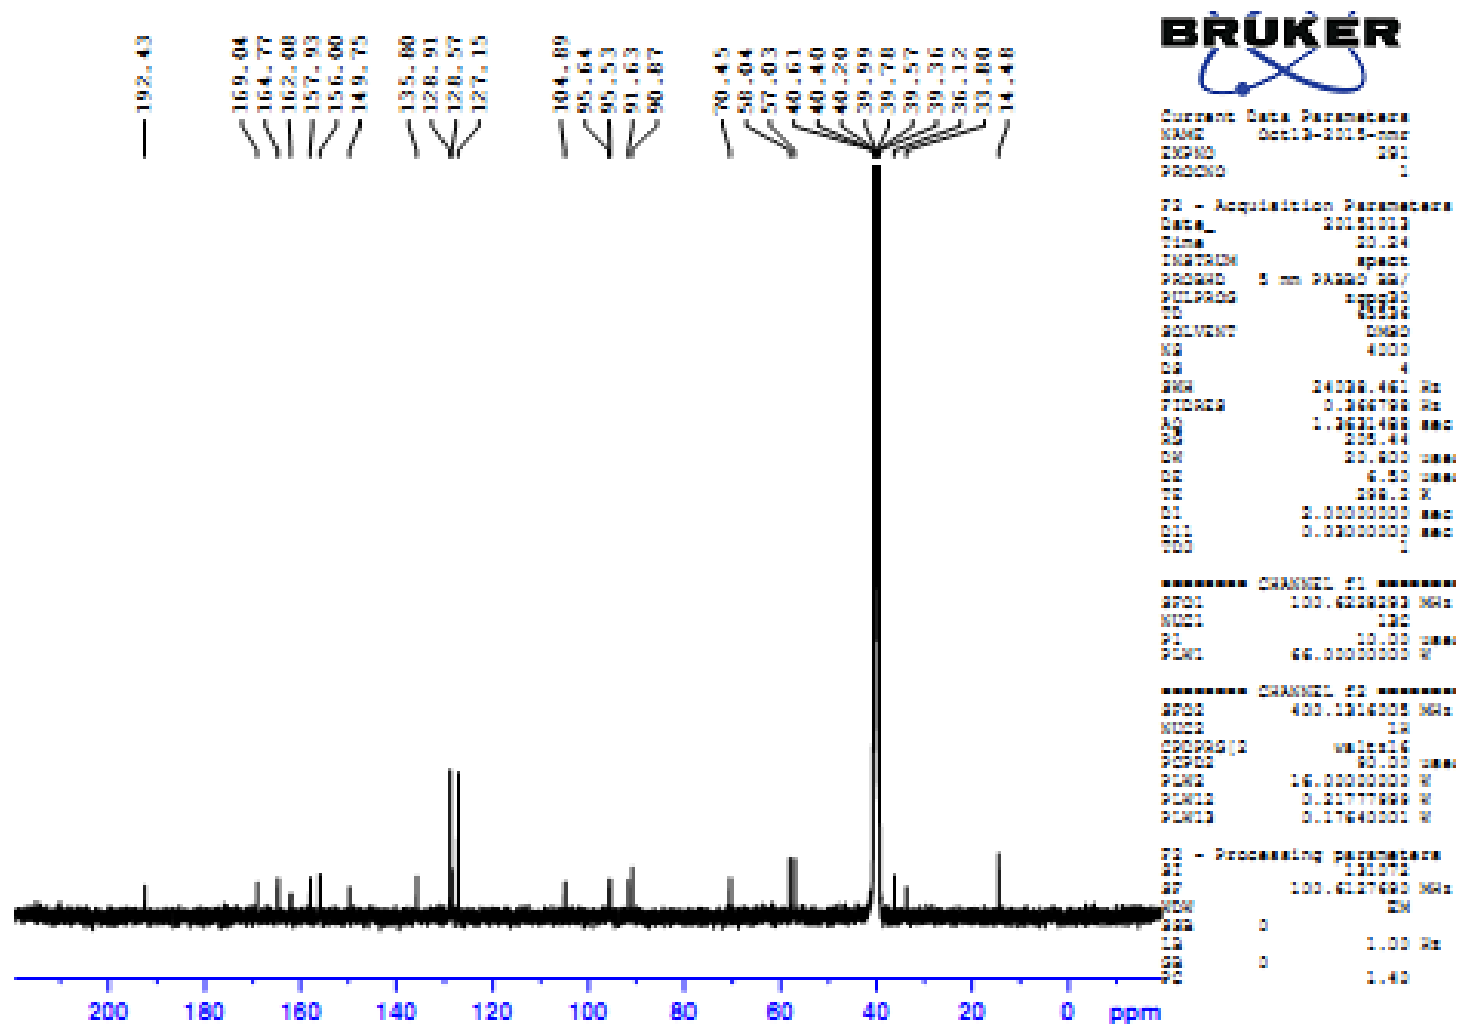

Supplement: f1 [file 7386125.f1.pdf]
